# Supplementary material for: Accuracy of serological testing for SARS‐CoV‐2 antibodies: First results of a large mixed‐method evaluation study
Source: PubMed Central journal article supplement — Allergy. 2020 Nov 13;76(3):853–65. doi: 10.1111/all.14608 (PMC7537154; doi:10.1111/all.14608), 2020-11-13

# Supplementary Figure 1

a

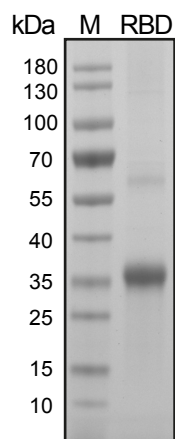

b

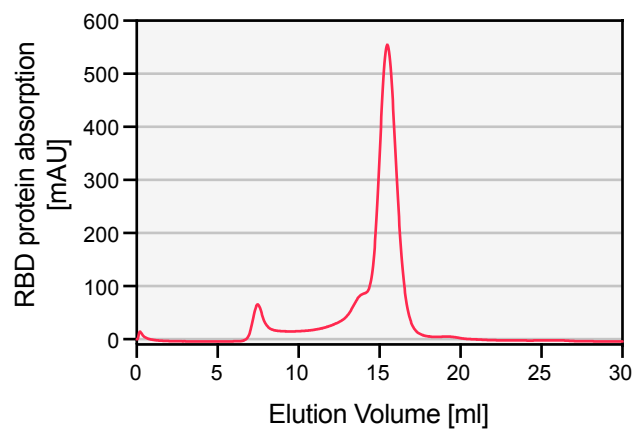

# Supplementary Figure 2

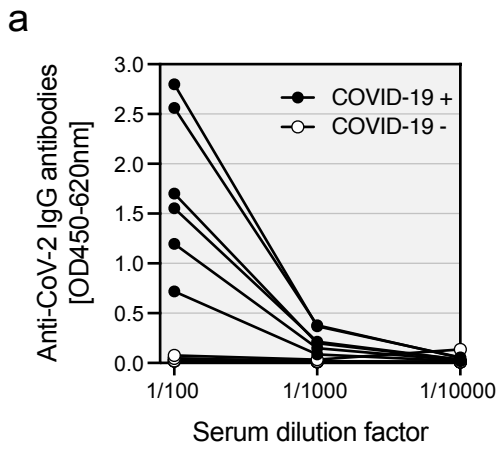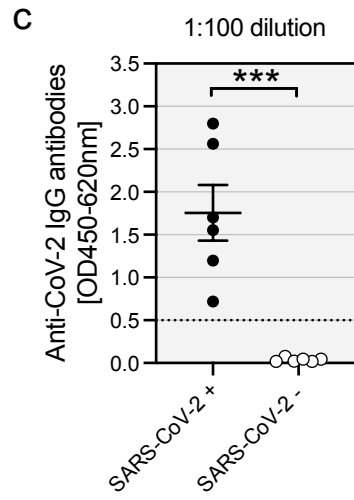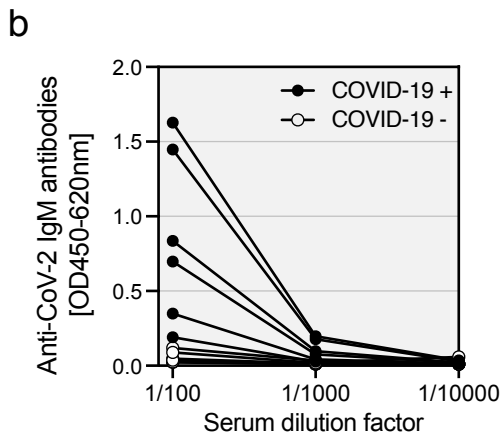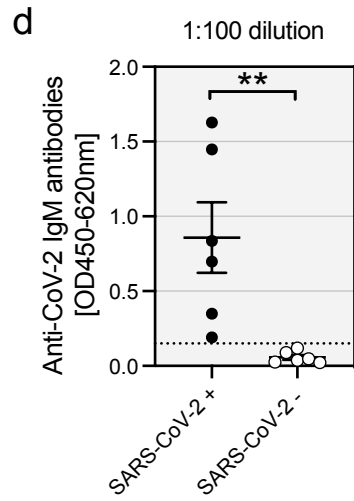

# Supplementary Figure 3

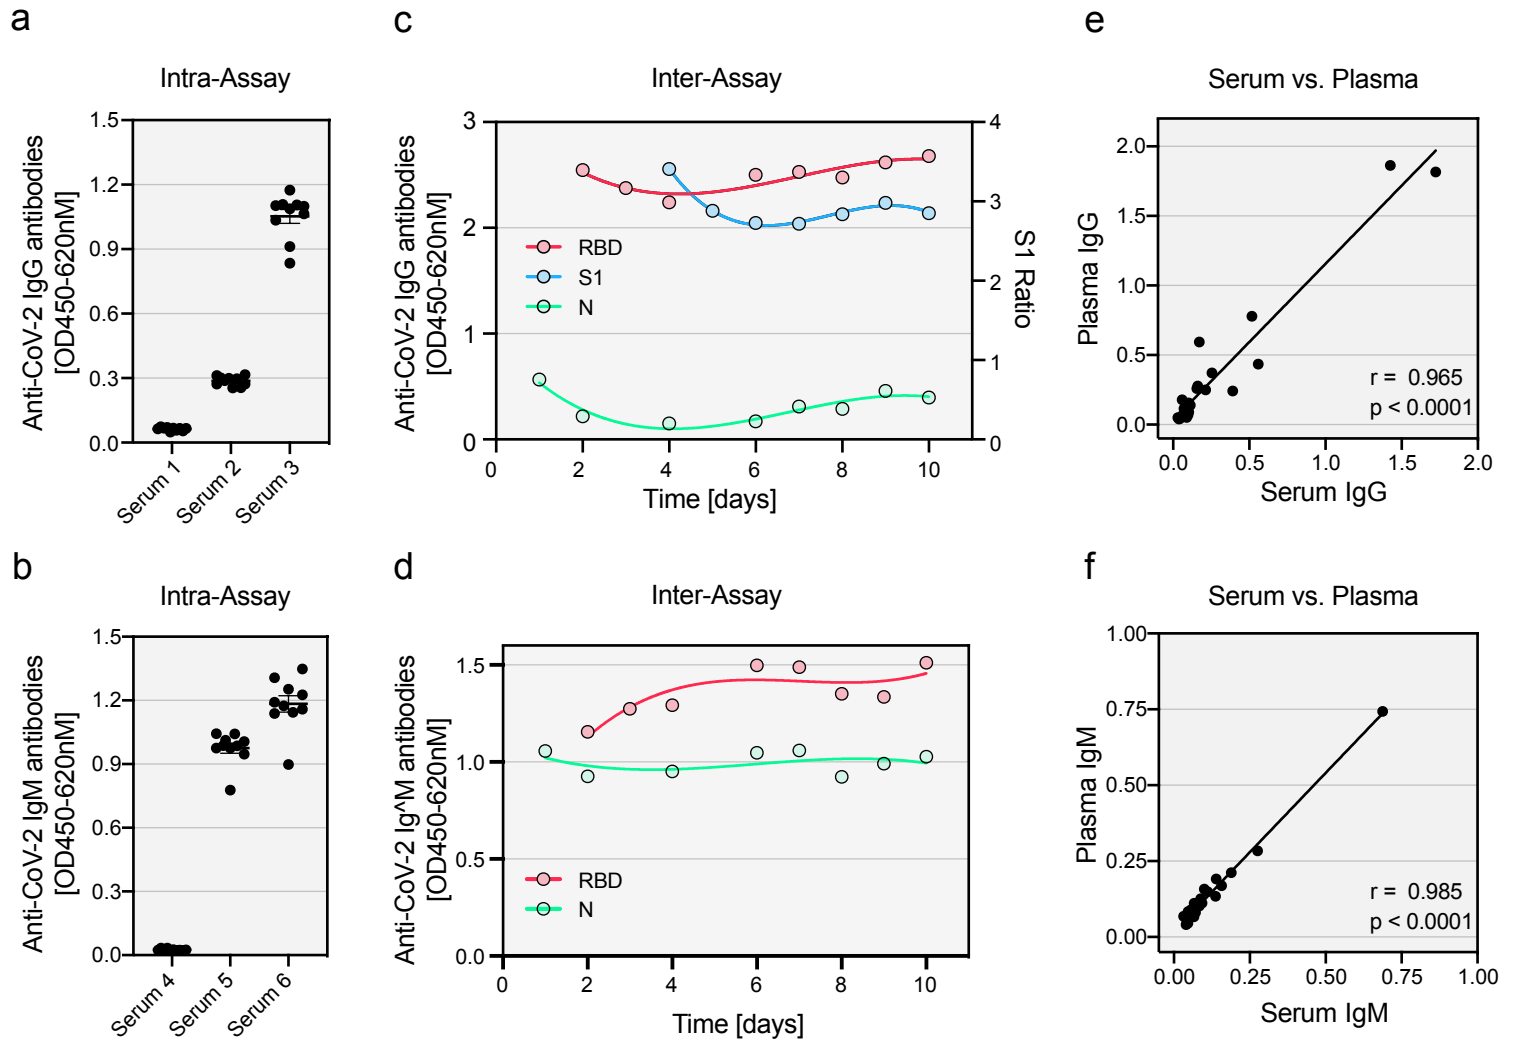

# Supplementary Figure 4

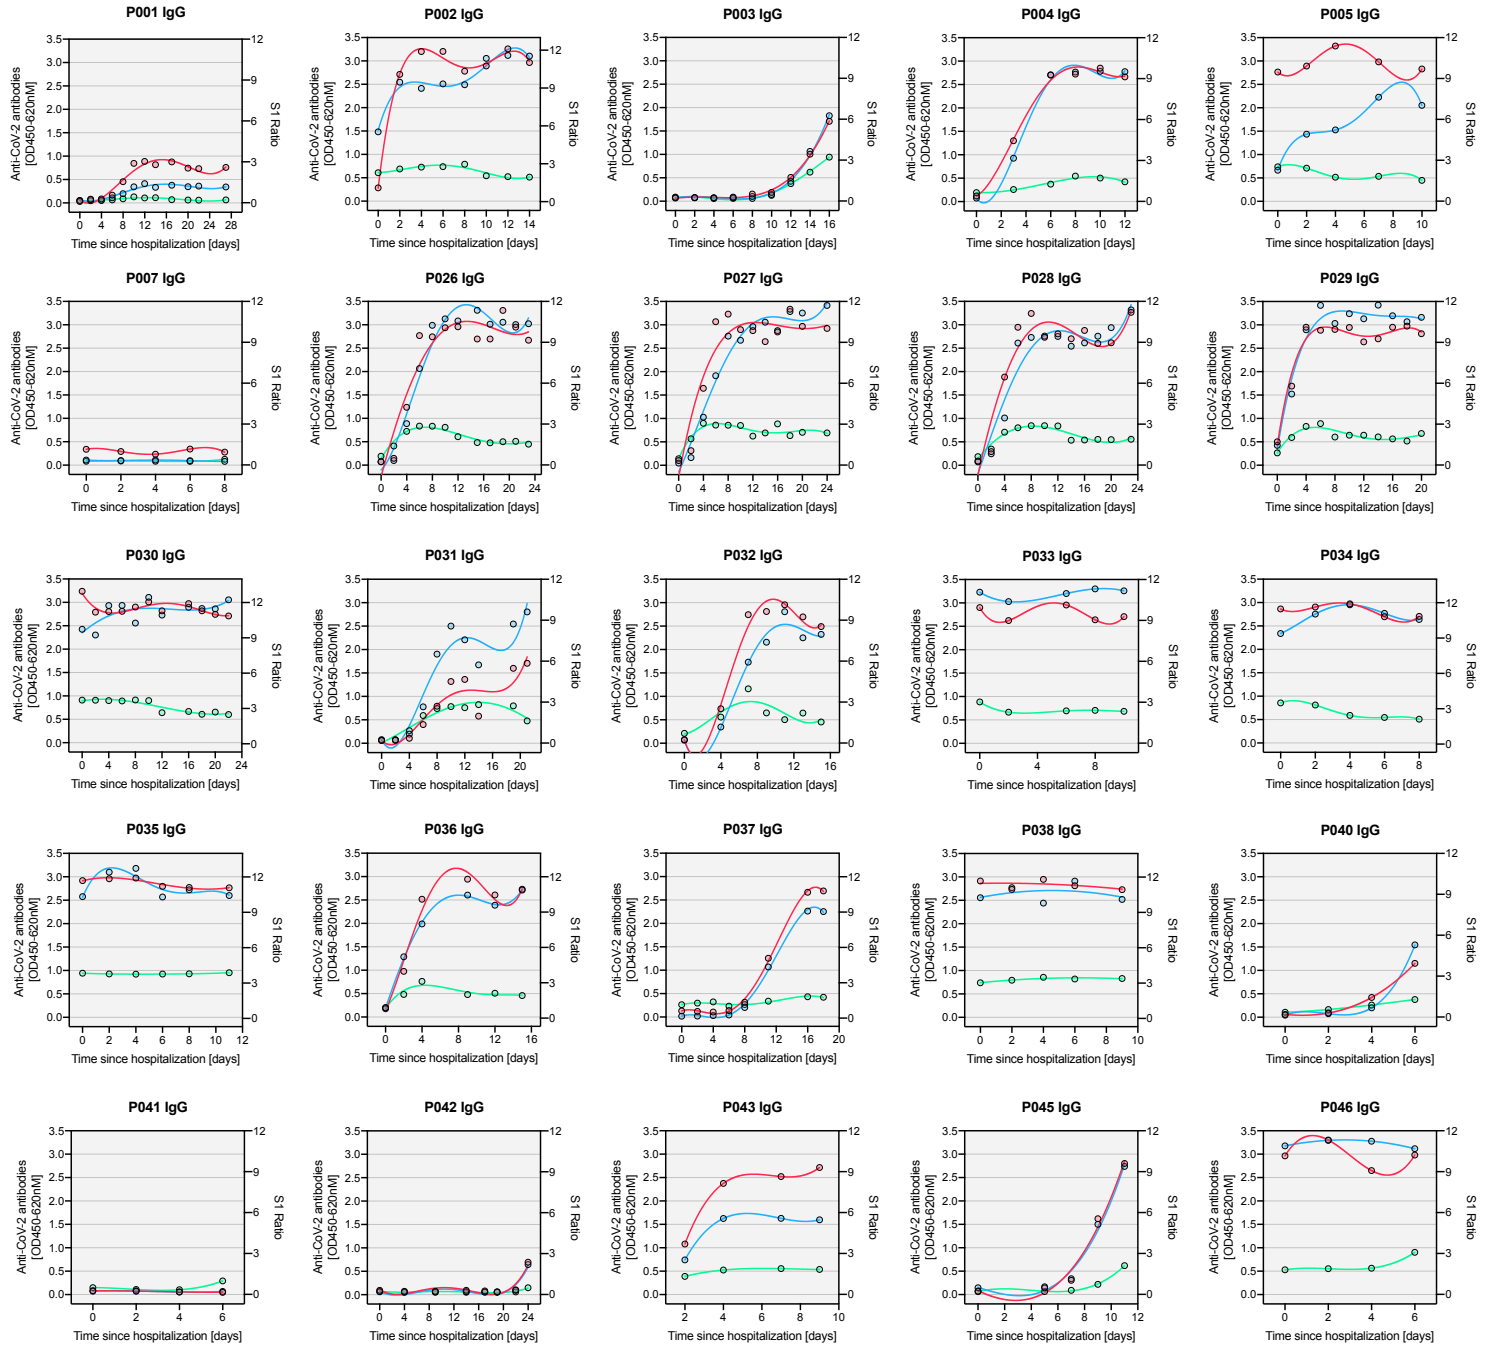

# Supplementary Figure 5

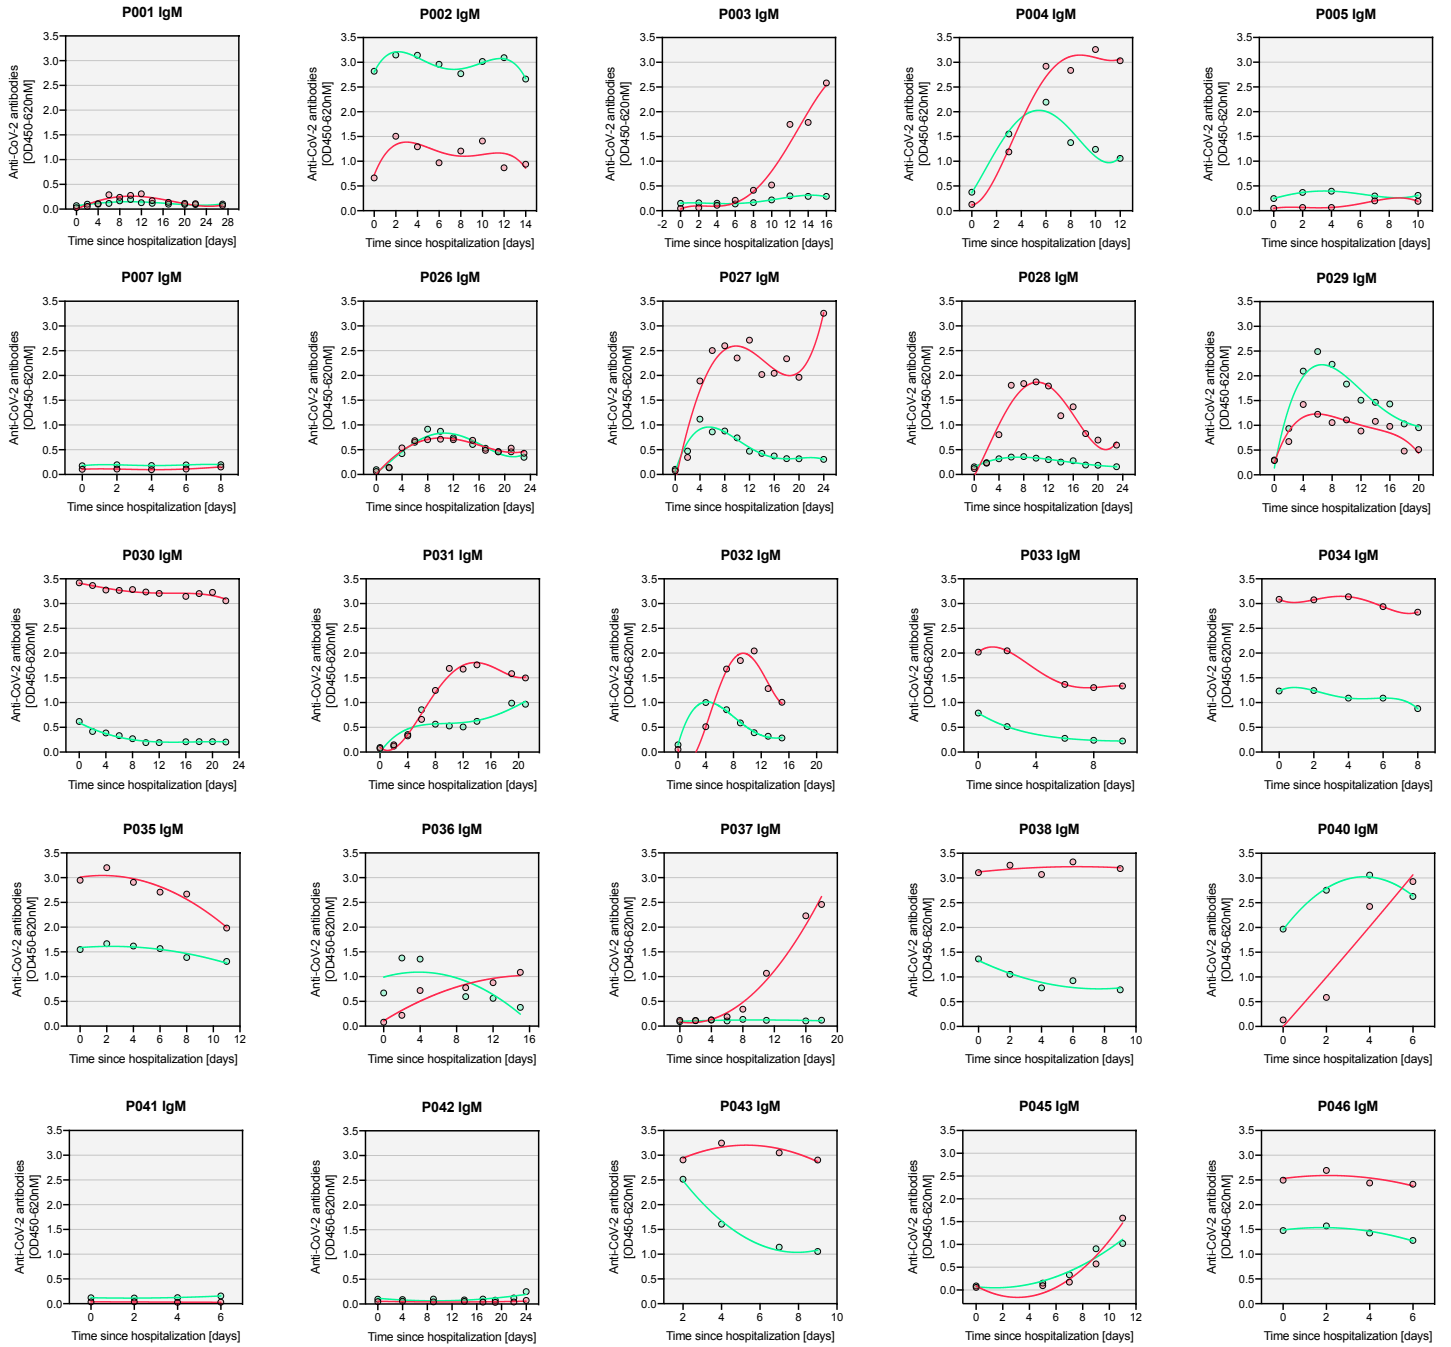

# Supplementary Figure 6

**a**

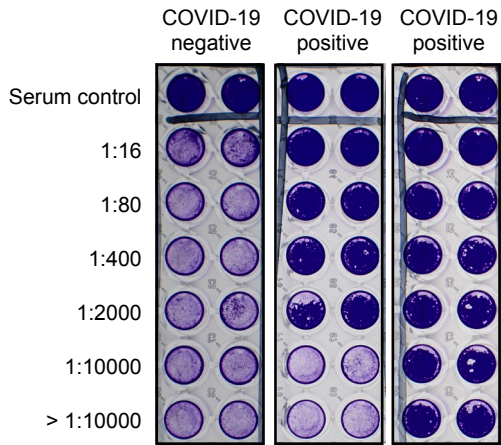

**b**

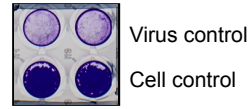

**c**

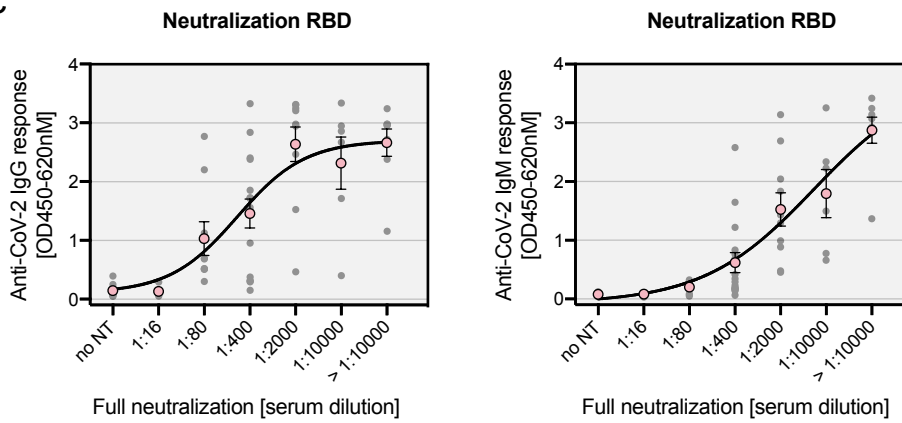

**d**

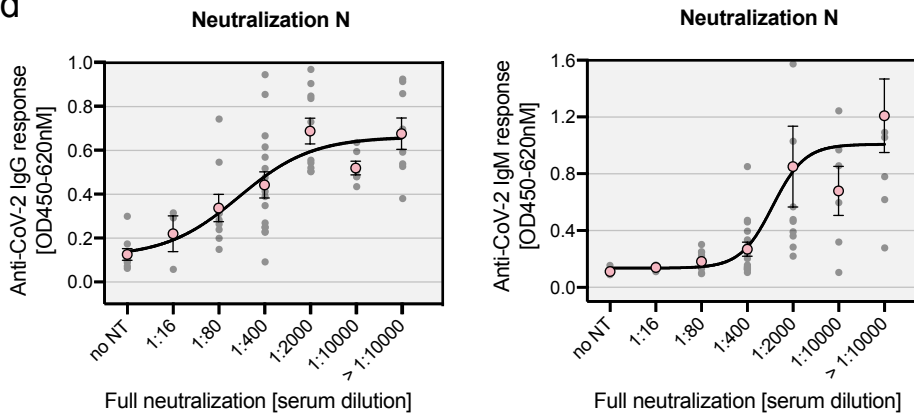

Supplement: ALL-76-853-s002.pdf [file ALL-76-853-s002.pdf]
